# Supplementary material
Source: PubMed Central journal article supplement (PMC514164)
Supplement: plntcell_tpc.021642_1.pdf [file plntcell_tpc.021642_1.pdf]

**Supplementary table.** Origin of the sequences used for the multiple sequence alignment of Supplementary figure1.

| Species                        | Name | Accession number or locus ( <i>Arabidopsis</i> )                                                   |                    |
|--------------------------------|------|----------------------------------------------------------------------------------------------------|--------------------|
|                                |      | cDNA <sup>a</sup>                                                                                  | Genome             |
| <i>Arabidopsis thaliana</i>    | GDU1 | AI999163; AU235690; AU226430                                                                       | At4g31730          |
|                                | GDU2 | AY086421                                                                                           | At4g25760          |
|                                | GDU3 | T42168; AV533941                                                                                   | At5g57685          |
|                                | GDU4 | AV553869; AV545182; AI995427; AU227153; AY089033                                                   | At2g24762          |
|                                | GDU5 | -                                                                                                  | At5g24920          |
|                                | GDU6 | -                                                                                                  | At3g30725          |
| <i>Beta vulgaris</i>           | Bv1  | BQ584528                                                                                           |                    |
| <i>Cryptomeria japonica</i>    | Cj1  | BP176128                                                                                           |                    |
| <i>Glycine max</i>             | Gm1  | AW706330; AW706308                                                                                 |                    |
|                                | Gm2  | BE058518; BI094873; BI094874                                                                       |                    |
|                                | Gm3  | BE611626                                                                                           |                    |
|                                | Gm4  | AW707186; BQ610520; BU545143; BU964524; AW567570                                                   |                    |
| <i>Hevea brasiliensis</i>      | Hb1  | CB376835; CB376914                                                                                 |                    |
| <i>Hordeum vulgare</i>         | Hv1  | AV930997; AV937252; BJ476290; BJ458923; CB868206; BJ451429; BJ472292; BF259878; AV926114; BJ471613 |                    |
|                                | Hv2  | BG344981; CA018201; CA030532; BQ758712; BF631610; AL508957; BI958513                               |                    |
|                                | Hv3  | BG345138; AL506349; BF257795; BQ470858; CA003680                                                   |                    |
| <i>Ipomoea nil</i>             | In1  | BJ553652                                                                                           |                    |
|                                | In2  | BJ577284; BJ561690                                                                                 |                    |
|                                | In3  | BJ562804; BJ574390; BJ558787; BJ578365                                                             |                    |
|                                | In4  | BU692248;                                                                                          |                    |
| <i>Lupinus albus</i>           | La1  | CA410438                                                                                           |                    |
|                                | La2  | CA411458                                                                                           |                    |
| <i>Lycopersicon esculentum</i> | Le1  | AW625655; BI932074; BI932407; BI932570                                                             |                    |
|                                | Le2  | BG124703; BI928405                                                                                 |                    |
| <i>Lotus japonicus</i>         | Lj1  | AV409452; AV412980; AV415079; AV422911                                                             |                    |
| <i>Lactuca sativa</i>          | Ls1  | BQ993309                                                                                           |                    |
| <i>Medicago truncatula</i>     | Mt1  | BE320077; AA660453                                                                                 |                    |
|                                | Mt2  | AJ502417; AJ503777; AW559406; AJ501580; AW559367                                                   | AC136954; C127169  |
|                                | Mt3  | BE997513; BI310976; BI311046                                                                       |                    |
| <i>Oryza sativa</i>            | Os1  |                                                                                                    | AP004838; AP004840 |
|                                | Os2  | C73987                                                                                             | AP004665           |
|                                | Os3  | BE040025                                                                                           | AP003579           |
|                                | Os4  | C19129                                                                                             | AP005495; AP005799 |
|                                | Os5  |                                                                                                    | AP004792           |
| <i>Phaseolus coccineus</i>     | Pc1  | CA913199                                                                                           |                    |
|                                | Pc2  | CA913883                                                                                           |                    |
| <i>Pinus</i>                   | Pin1 | AI812343                                                                                           |                    |
|                                | Pin2 | AW010037                                                                                           |                    |
|                                | Pin3 | AW754873                                                                                           |                    |
|                                | Pin4 | BG040437                                                                                           |                    |
|                                | Pin5 | BM492506; BE241267; BQ290644; AI812395; AW290165; AW290850                                         |                    |
|                                | Pin6 | BX254641; BX251126                                                                                 |                    |
| <i>Populus</i>                 | Pop1 | BU892695; BU865422; BU862384; BU875395; BU895110; CA933810                                         |                    |
|                                | Pop2 | CA825248; CA825249                                                                                 |                    |
| <i>Sorghum bicolor</i>         | Sb1  | AW680912; BE595222; AW681046; AW922145                                                             |                    |
|                                | Sb2  | BE355792                                                                                           |                    |
|                                | Sb3  | BE358925; BE358963                                                                                 |                    |
|                                | Sb4  | BE359170                                                                                           |                    |
| <i>Triticum aestivum</i>       | Ta1  | BE415645; BE423707; BF483512; BF485259; BQ805730; CA741083                                         |                    |
|                                | Ta2  | BQ484092; CA662237                                                                                 |                    |
|                                | Ta3  | CA729026                                                                                           |                    |
|                                | Ta4  | CA525324; CA593166                                                                                 |                    |

<sup>a</sup> Include EST (Expressed Sequence Tag), RAFL (Riken Arabidopsis Full Length) and CERES, Inc. cDNA sequences.
