# Supplementary material
Source: PubMed Central journal article supplement (PMC514164)
Supplement: plntcell_tpc.021642_4.pdf [file plntcell_tpc.021642_4.pdf]

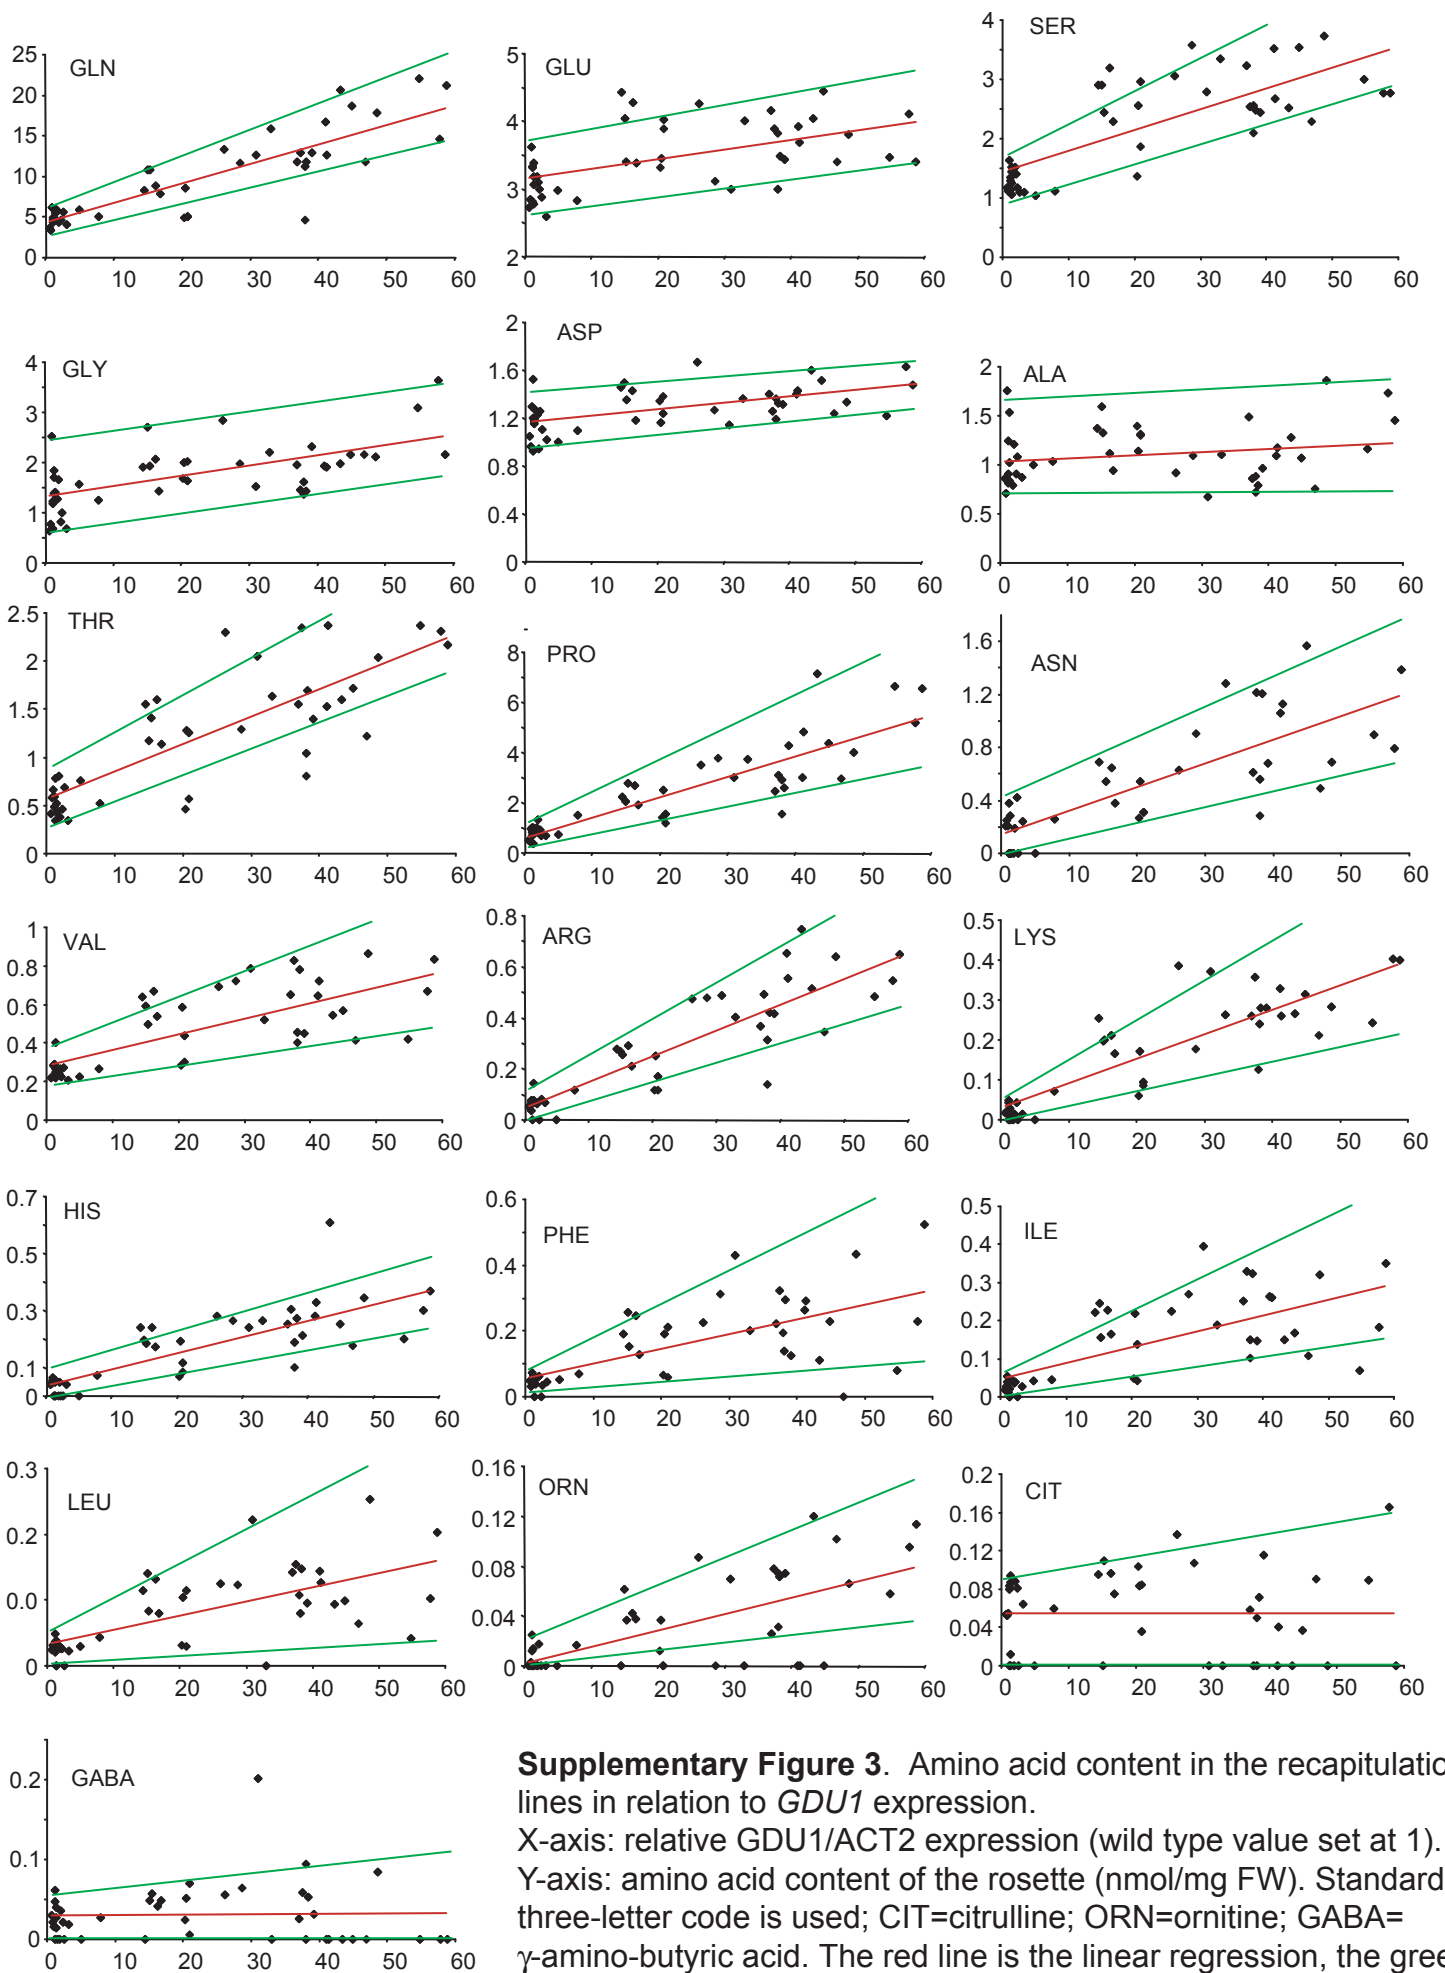

**Supplementary Figure 3.** Amino acid content in the recapitulation lines in relation to *GDU1* expression. X-axis: relative *GDU1*/*ACT2* expression (wild type value set at 1). Y-axis: amino acid content of the rosette (nmol/mg FW). Standard three-letter code is used; CIT=citrulline; ORN=ornitine; GABA= $\gamma$ -amino-butyric acid. The red line is the linear regression, the green lines represent the upper and lower limits of the data point distribution.
