# Supplementary material
Source: PubMed Central journal article supplement (PMC514164)
Supplement: plntcell_tpc.021642_5.pdf [file plntcell_tpc.021642_5.pdf]

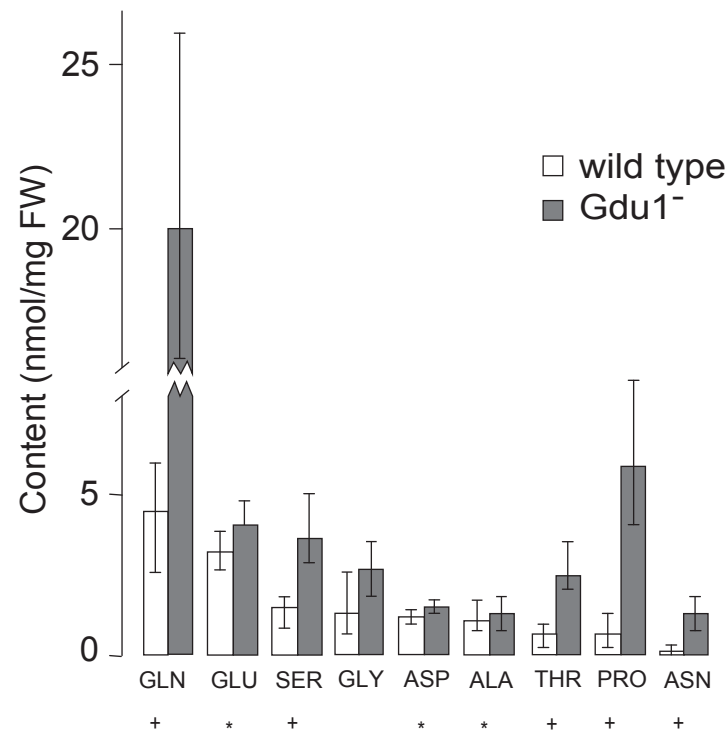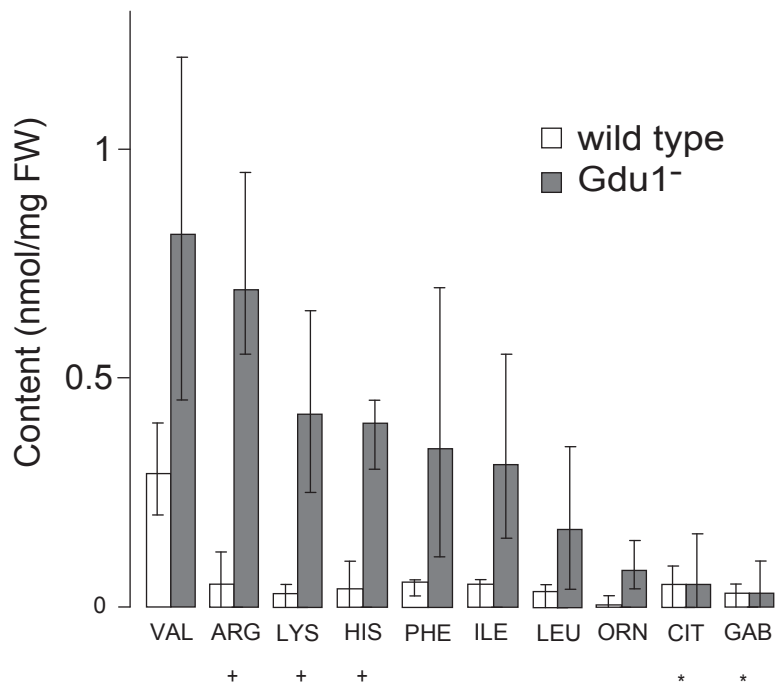

**Supplementary figure 4.** Variation of the content of each amino acid between relative GDU1/ACT2 ratio 1 (white bars) and 60 (gray bars). Values are the amino acid content when GDU1/ACT2=1 (wild type) and 60 (Gdu1<sup>-</sup>) and error bars are calculated as the values of the green lines of Supplementary figure 2 when GDU1/ACT2=1 and 60. "+" notes an amino acid whose variation is strongly increased with no overlap of the error bars; "\*" notes an amino acid whose variation is less than 20%. Standard three letter code is used for amino acids; CIT: citrulline; GAB:  $\gamma$ -amino-butyric-acid; ORN: ornitine.
